# Supplementary material for: Are flood-driven turbidity currents hot spots for priming effect in lakes?
Source: Copernicus journal article supplement (doi:10.5194/bg-13-3573-2016), 2016-06-20
Supplement: Supplementary file 1 [file bg-13-3573-2016-supplement.pdf]

Supplement of Biogeosciences, 13, 3573–3584, 2016  
<http://www.biogeosciences.net/13/3573/2016/>  
doi:10.5194/bg-13-3573-2016-supplement  
© Author(s) 2016. CC Attribution 3.0 License.

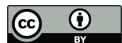

Biogeosciences  Open Access

*Supplement of*

## **Are flood-driven turbidity currents hot spots for priming effect in lakes?**

**Damien Bouffard and Marie-Elodie Perga**

*Correspondence to:* Marie-Elodie Perga ([marie-elodie.perga@thonon.inra.fr](mailto:marie-elodie.perga@thonon.inra.fr))

The copyright of individual parts of the supplement might differ from the CC-BY 3.0 licence.

1

2

3

4

5

6

7

8

9

10

## Supplement

11

12 S1. The thickness of the intrusion provides information on the dilution of the riverine water by lake  
13 water. We assume first that horizontal dispersion,  $K_H$ , is of same order as vertical dispersion,  $K_z$  (e.g.  
14 conservative case as typically,  $K_H > K_z$ ). The rate of dilution,  $\Gamma_\delta$ , can be defined by  $\Gamma_\delta = \delta i / \delta j$   
15 , with  $\delta$  the thickness of the intrusion at the location defined by indices  $i$  and  $j$ . Taking  $i = \text{BP22}$  or  
16 entrance of the river Dranse, respectively and  $j = \text{BP18}$ , gives  $\Gamma_\delta = 46\%$  ( $i = \text{BP22}$ ) and  $\Gamma_\delta = 0.9\%$  ( $i$   
17 = entrance of river Dranse).

18 The rate of dilution within the intrusion can also be estimated, assuming negligible particle settling  
19 away from the plunging point, by comparing the averaged temperature anomaly in 2 profiles (e.g.  
20 BP22 and BP18). The intrusion density,  $\rho_I$ , is a function of temperature  $\rho_T$ , and particle concentration  
21  $\rho_C$  with  $\rho_I = \rho_T + \rho_C$  (Figure 2).  $\rho_I$  is calculated from the linearly interpolated temperature profile in  
22 the absence of intrusion. In so doing, we estimate  $\Gamma_\rho = \rho_{C, \text{BP18}} / \rho_{C, \text{BP22}} = 29\%$  over the 4 km distance  
23 between BP22 and BP18. To have  $\Gamma_\delta = \Gamma_\rho$ , implies to have an horizontal dispersion 1.5 times larger  
24 than the vertical dispersion and will lead to a Dranse river fraction at BP18 of 0.4%. These bulk  
25 estimates suggest that the river water is first efficiently mixed in the underflow stage (e.g. most of the

1 dilution is done before the intrusion reaches BP22), then, the dilution rate becomes smaller allowing  
2 the intrusion to propagate over a long distance.

3 For SHL2 (BP18), the riverine fraction is about O(1%) and, as shown above, river contribution  
4 increases as stations are closer to the river mouths. The 50% dilution treatment was therefore quite out  
5 of the range of possible dilution, we then focussed more attention on the functional consequences of  
6 river contribution at low fractions.

7

8

1 S2.

2 CTD vertical profiles (Temperature, dissolved oxygen concentrations and turbidity) at each

3 sampled station.

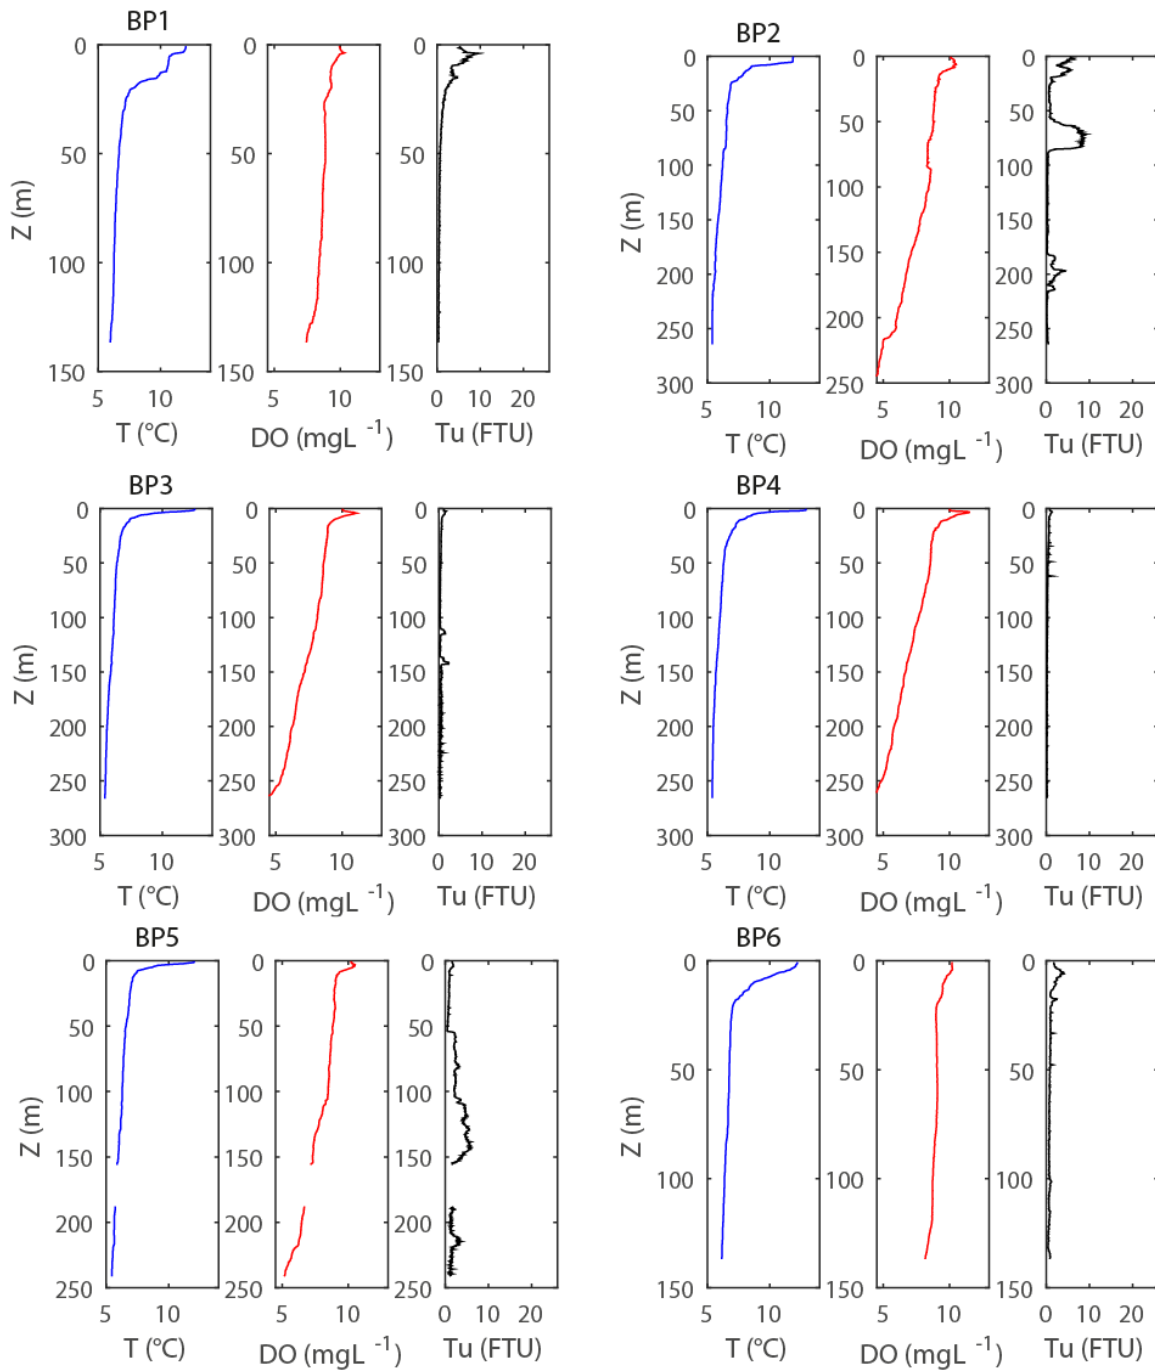

4

5

6

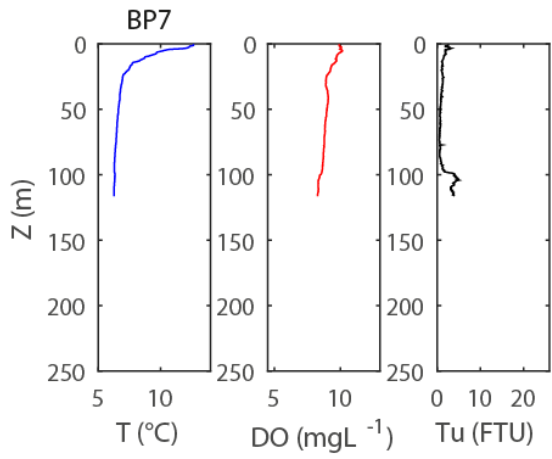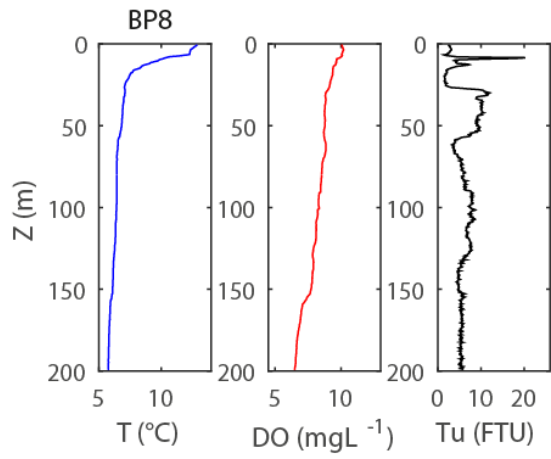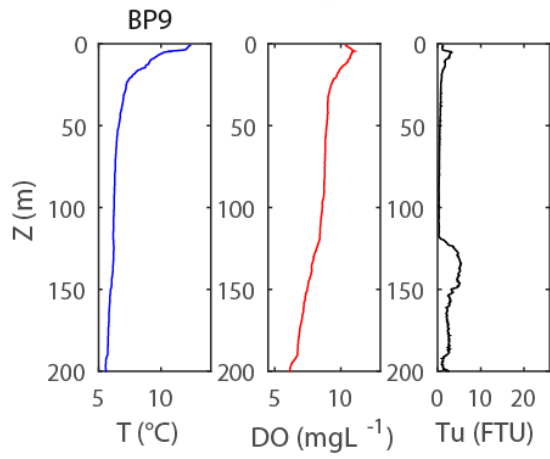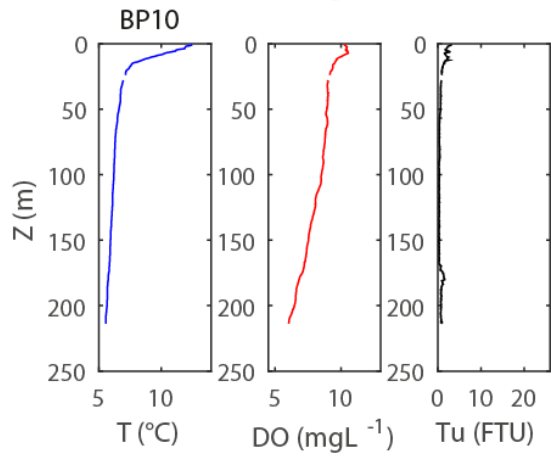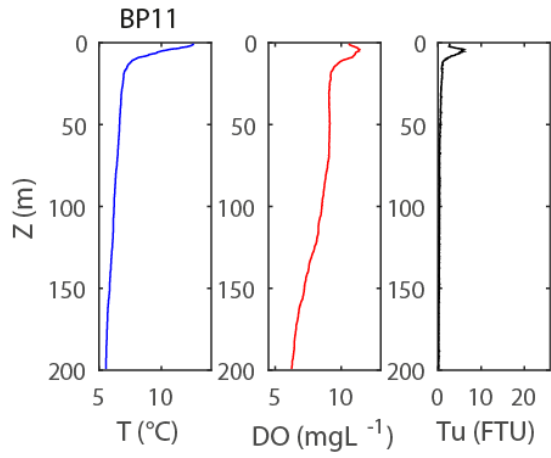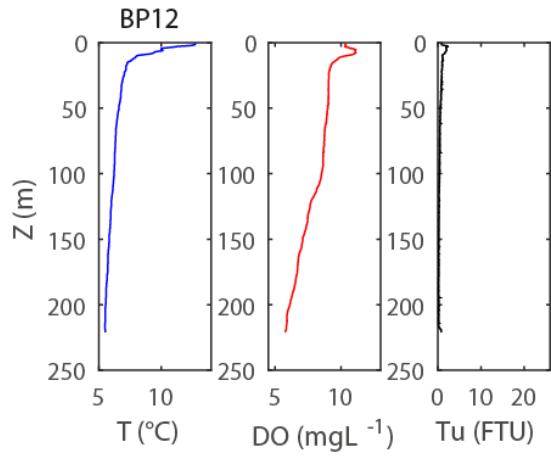

1

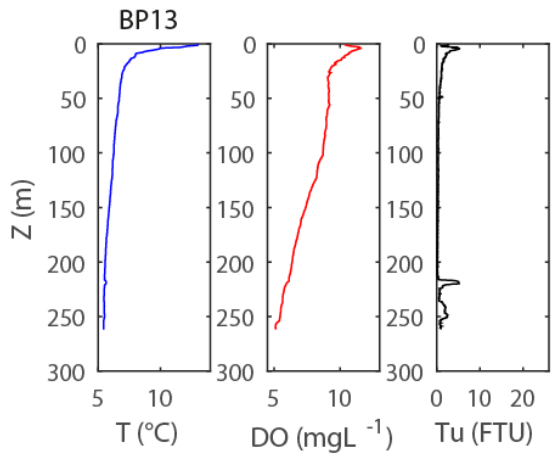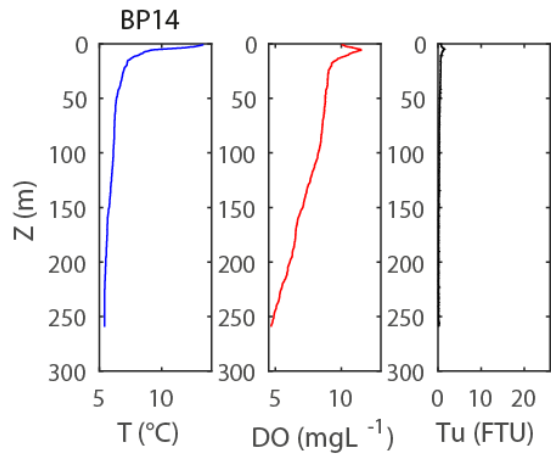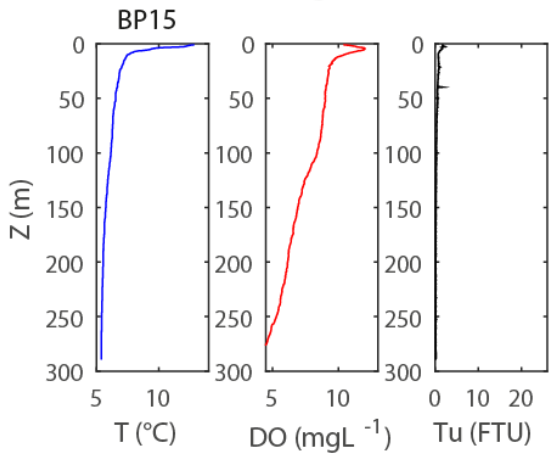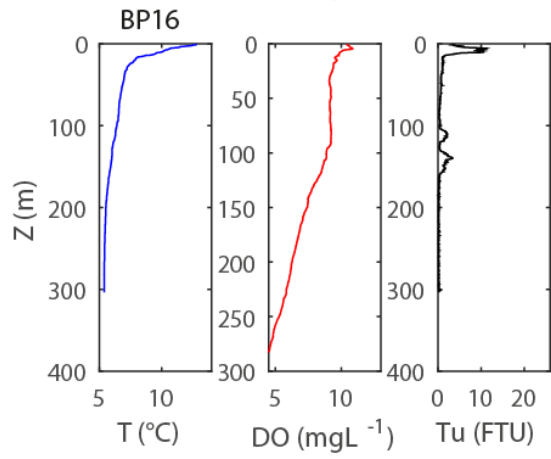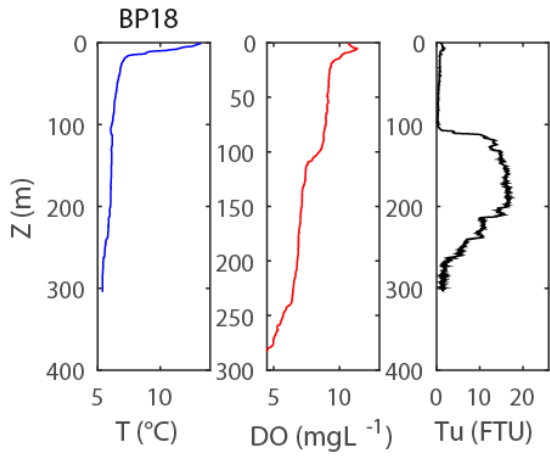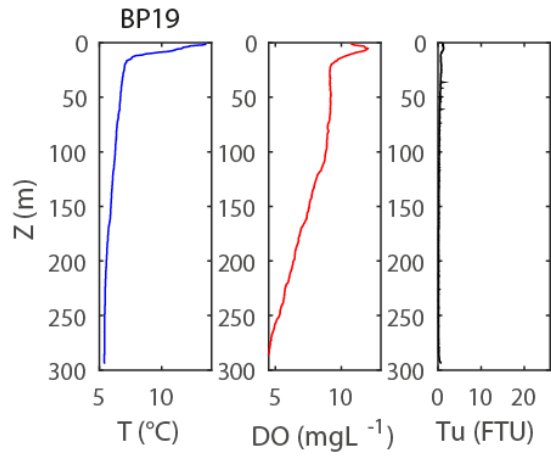

1

2

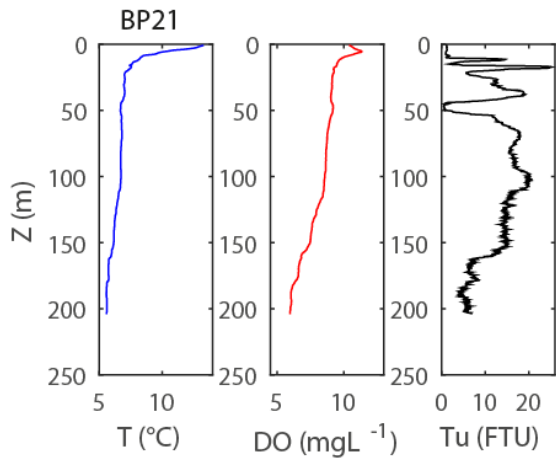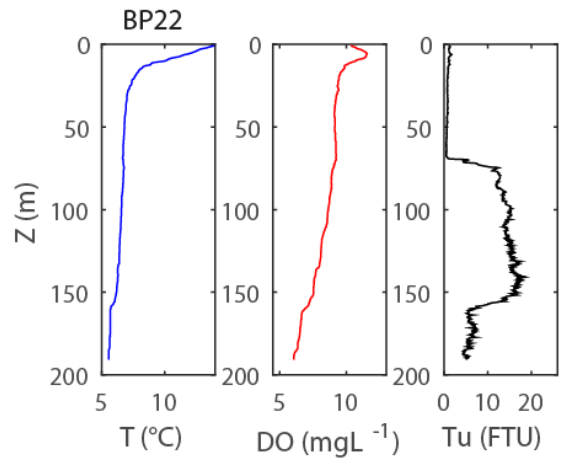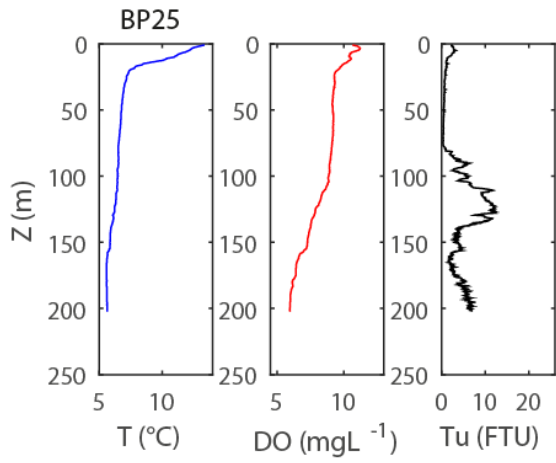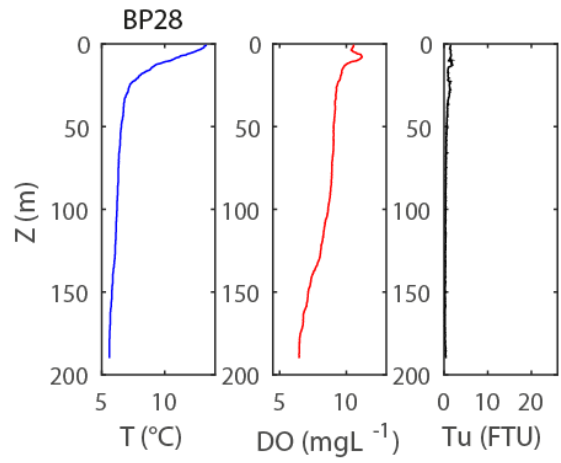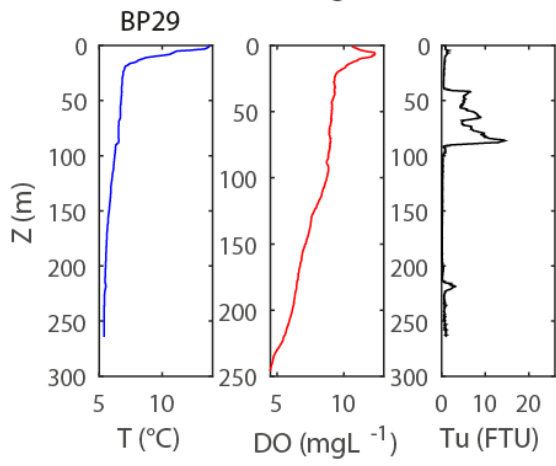

- 1
- 2
- 3
- 4
- 5

1 S3. Detailed oxygen vertical profiles at the sampling sites closer to the Dranse River mouth.

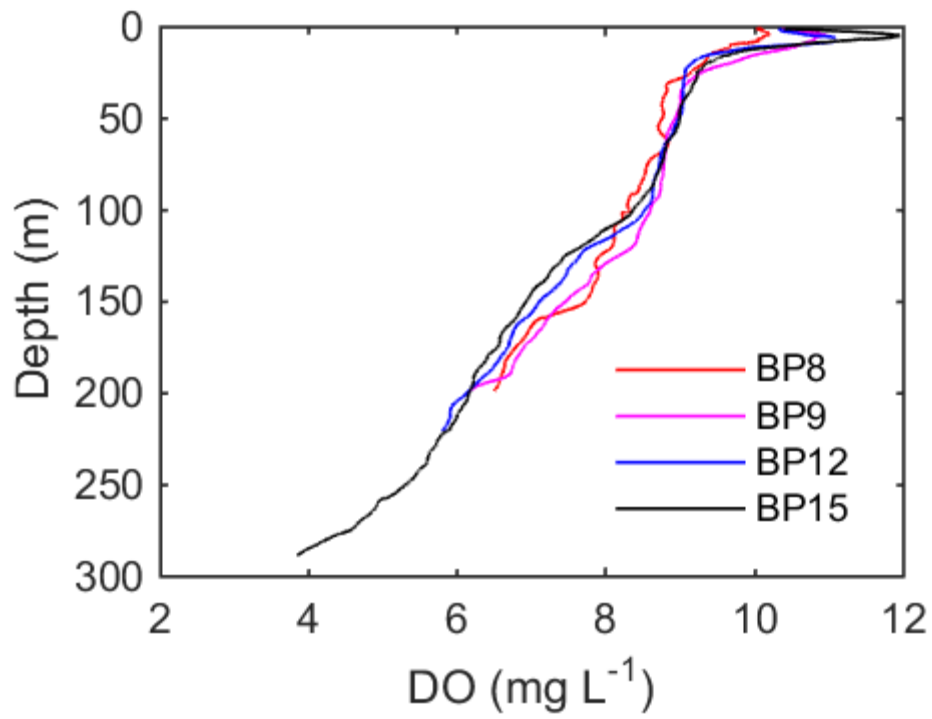

2  
3



1 S4. Fitted relationship between the Rhône River sediment load (concentration) and discharge.

2

3

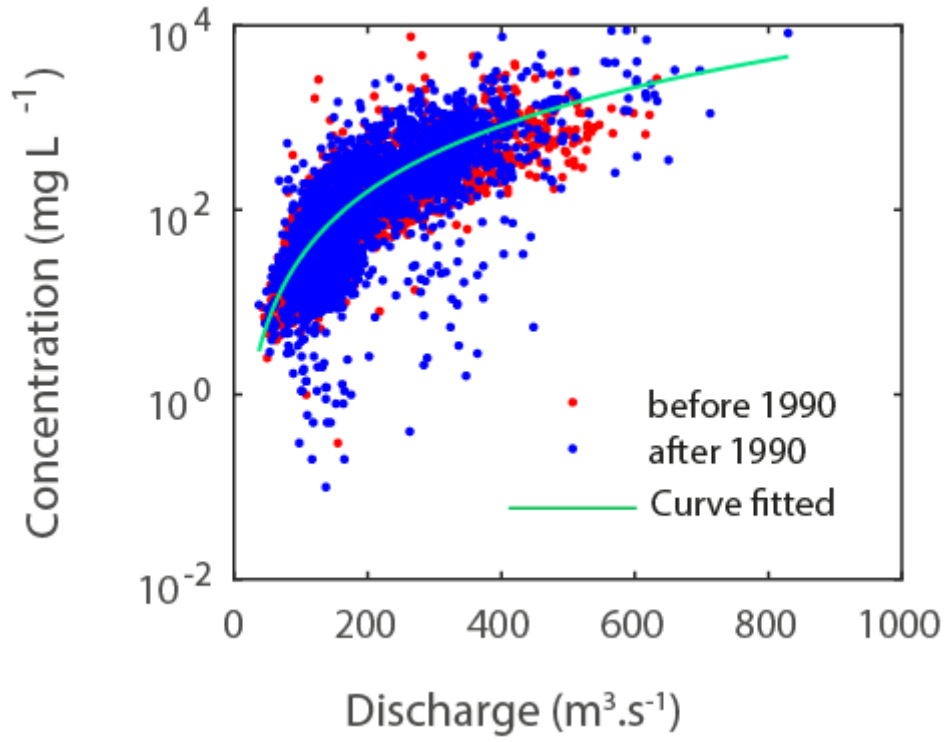

4

5

6

7

1 S5. GPS locations of the CTD profiles.

2

|      |         |          |
|------|---------|----------|
| BP1  | 6.65535 | 46.48196 |
| BP2  | 6.74681 | 46.47204 |
| BP3  | 6.73746 | 46.45538 |
| BP4  | 6.72681 | 46.44335 |
| BP5  | 6.76507 | 46.43823 |
| BP6  | 6.82108 | 46.42729 |
| BP7  | 6.79751 | 46.42411 |
| BP8  | 6.81049 | 46.40934 |
| BP9  | 6.78839 | 46.41372 |
| BP10 | 4.77548 | 46.40600 |
| BP11 | 6.75064 | 46.41646 |
| BP12 | 6.75885 | 46.42551 |
| BP13 | 6.72372 | 46.41630 |
| BP14 | 6.73042 | 46.43069 |
| BP15 | 6.69043 | 46.43947 |
| BP16 | 6.64098 | 46.45186 |
| BP18 | 6.58872 | 46.45270 |
| BP19 | 6.54273 | 46.43007 |
| BP21 | 6.53978 | 46.41241 |
| BP22 | 6.52600 | 46.41216 |
| BP25 | 6.51537 | 46.41379 |
| BP28 | 6.47253 | 46.45149 |
| BP29 | 6.55481 | 46.46611 |
| BP30 | 6.60594 | 46.49139 |

3

4

5
